# Supplementary material for: Identification and performance evaluation of housekeeping genes for microRNA expression normalization by reverse transcription-quantitative PCR using liquid-based cervical cytology samples
Source: PubMed Central journal article supplement — Oncol Lett. 2019 Sep 6;18(5):4753–61. doi: 10.3892/ol.2019.10824 (PMC6781752; doi:10.3892/ol.2019.10824), 2019-09-06
Supplement: Supplementary_Data.pdf [file Supplementary_Data.pdf]

Table SI. Assay names from inventoried primers and probes of the six candidate housekeeping genes tested.

| Assay name | Assay ID |
|------------|----------|
| RNU-44     | 001094   |
| U6         | 001973   |
| RNU-49     | 001005   |
| RNU-48     | 001006   |
| RNU-47     | 001223   |
| miR-16     | 000391   |
